# Supplementary material for: Genomes of surface isolates of Alteromonas macleodii: the life of a widespread marine opportunistic copiotroph
Source: PubMed Central journal article supplement — Sci Rep. 2012 Sep 26;2:696. doi: 10.1038/srep00696 (PMC3458243; doi:10.1038/srep00696), 2012-09-26
Supplement: srep00696-s1.pdf [file srep00696-s1.pdf]

**Genomes of surface isolates of *Alteromonas macleodii*: the life of a widespread marine opportunistic copiotroph**

Mario López-Pérez<sup>1</sup>, Aitor Gonzaga<sup>1</sup>, Ana-Belen Martin-Cuadrado<sup>1</sup>, Olga Onyshchenko<sup>1</sup>, Akbar Ghavidel<sup>1</sup>, Rohit Ghai<sup>1</sup> and Francisco Rodriguez-Valera<sup>1\*</sup>

<sup>1</sup>Evolutionary Genomics Group, División de Microbiología, Universidad Miguel Hernández, Apartado 18, San Juan 03550, Alicante, Spain

\*Corresponding author:

Evolutionary Genomics Group, División de Microbiología, Universidad Miguel Hernández, Apartado 18, San Juan 03550, Alicante, Spain

Phone +34-965919313, Fax +34-965 919457

**Supplementary Table 1.** Sequencing details.

|                       |                            | <i>A. macleodii</i> strains |             |             |
|-----------------------|----------------------------|-----------------------------|-------------|-------------|
|                       |                            | 673                         | AD45        | BS11        |
| Sequencing technology |                            |                             |             |             |
| Roche (454)           | Total pb                   | 124030529                   | 138685183   | 121195022   |
|                       | Average read length (bp)   | 478                         | 470         | 456         |
|                       | Paired End (Reads/Average) | 500025/2922                 | 562619/2965 | 505401/2970 |
| Illumina (Solexa)     | Total pb                   | 965804846                   | 965589766   | 1004556296  |
|                       | Average read length (bp)   | 38                          | 38          | 38          |

**Supplementary Table 2.** List of Housekeeping-genes used for the phylogenetic tree.

universal stress protein UspE  
Transcriptional regulator  
GTP binding protein Era  
sodium calcium exchanger  
histone deacetylase superfamily protein  
hydroxymethylglutaryl CoA lyase  
putative ATP synthase F0 A subunit  
malate dehydrogenase  
putative exopolysaccharide biosynthesis protein  
sulfate adenylyltransferase subunit 2  
glucose 1 phosphate thymidyltransferase  
glutaminase  
chemotaxis protein CheV  
diguanylate cyclase  
tyrosine recombinase  
NAD kinase  
putative acyltransferase  
methionyl tRNA formyltransferase  
rod shape determining protein MreC  
putative transcriptional regulator  
exopolyphosphatase related protein  
MscS Mechanosensitive ion channel  
2 methylisocitrate lyase  
Zn dependent hydrolase glyoxylase family protein  
peptide transport protein ABC superfamily membrane  
fused GNAT family acetyltransferase/Paal related uncharacterized conserved domain  
hypothetical protein AmacA2\_01913  
ribonuclease BN  
ABC transporter ATP binding protein  
chromosome replication initiation inhibitor protein  
K dependent Na /Ca exchanger related protein  
flagellar basal body rod protein FlgG  
response regulator receiver modulated CheW protein  
flagellar biosynthesis sigma factor  
recombination associated protein  
hypothetical protein AmacA2\_03691  
DNA adenine methylase  
putative transcriptional regulator with periplasmic binding protein domain LysR family  
Conserved membrane protein RarD  
GumN  
porphobilinogen deaminase  
tyrosine recombinase  
DNA binding transcriptional activator GcvA  
SAM dependent methyltransferase  
putative transmembrane protein  
ABC type amino acid transport/signal transduction system periplasmic component/domain  
hypothetical protein AmacA2\_09356

S adenosyl methyltransferase MraW  
ribose phosphate pyrophosphokinase  
lipoyl synthase  
geranyltranstransferase  
UDP 3 O [3 hydroxymyristoyl] N acetylglucosamine deacetylase  
peptidase M23/M37 family protein  
putative flagellar biosynthesis  
integral membrane protein  
predicted glutathione S transferase  
hypothetical protein AmacA2\_01513  
Phosphatidylserine decarboxylase  
molecular chaperone Dna K  
RNA polymerase beta subunit rpoB  
Succinyl-CoA ligase  
hypothetical protein AmacA2\_00434  
phosphoglucomutase  
methionyl-tRNA synthetase  
serine hydroxymethyltransferase  
 $\beta$  subunit of the DNA gyrase  
transcriptional regulator

**Supplementary Table-3.** Growth of *A. macleodii* in different conditions.

| <i>A. macleodii</i><br>strains | Temperature (°C) |     | Salinity (%NaCl) |     | Minimum Inhibitory<br>Concentration |                        |
|--------------------------------|------------------|-----|------------------|-----|-------------------------------------|------------------------|
|                                | min              | max | min              | max | Zn(CH <sub>3</sub> COO)<br>(Mm)     | HgCl <sub>2</sub> (mM) |
| AltDE                          | 10               | 42  | 0,50             | 20  | 5                                   | 0,1                    |
| 673                            | 10               | 45  | 0,50             | 19  | 5                                   | 0,05                   |
| AD45                           | 10               | 43  | 0,50             | 18  | 5                                   | 0,05                   |
| BS11                           | 10               | 42  | 0,25             | 18  | 5                                   | 0,05                   |

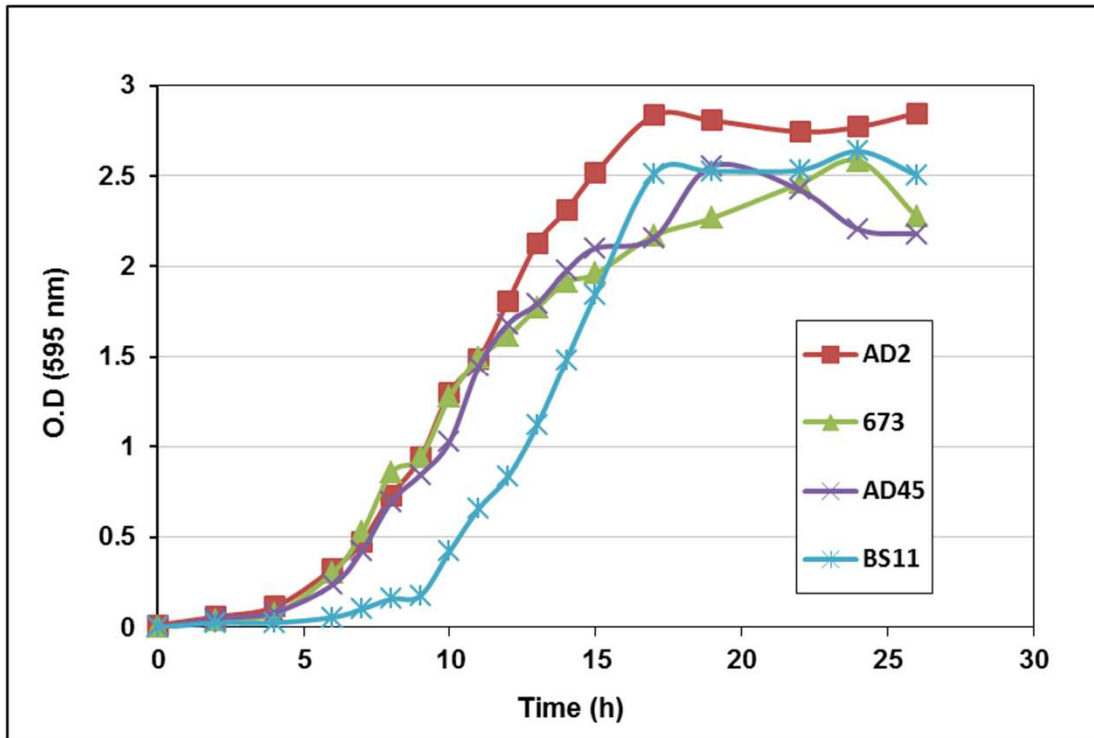

**Supplementary Figure 1.** Growth of *A. macleodii* strains AltDE, AD45, BS11, ATCC and 673 in marine broth at 20°C. Cultures were carried out in 250 ml erlenmeyer flasks with 50 ml medium and orbitally shaken at 200 rpm.

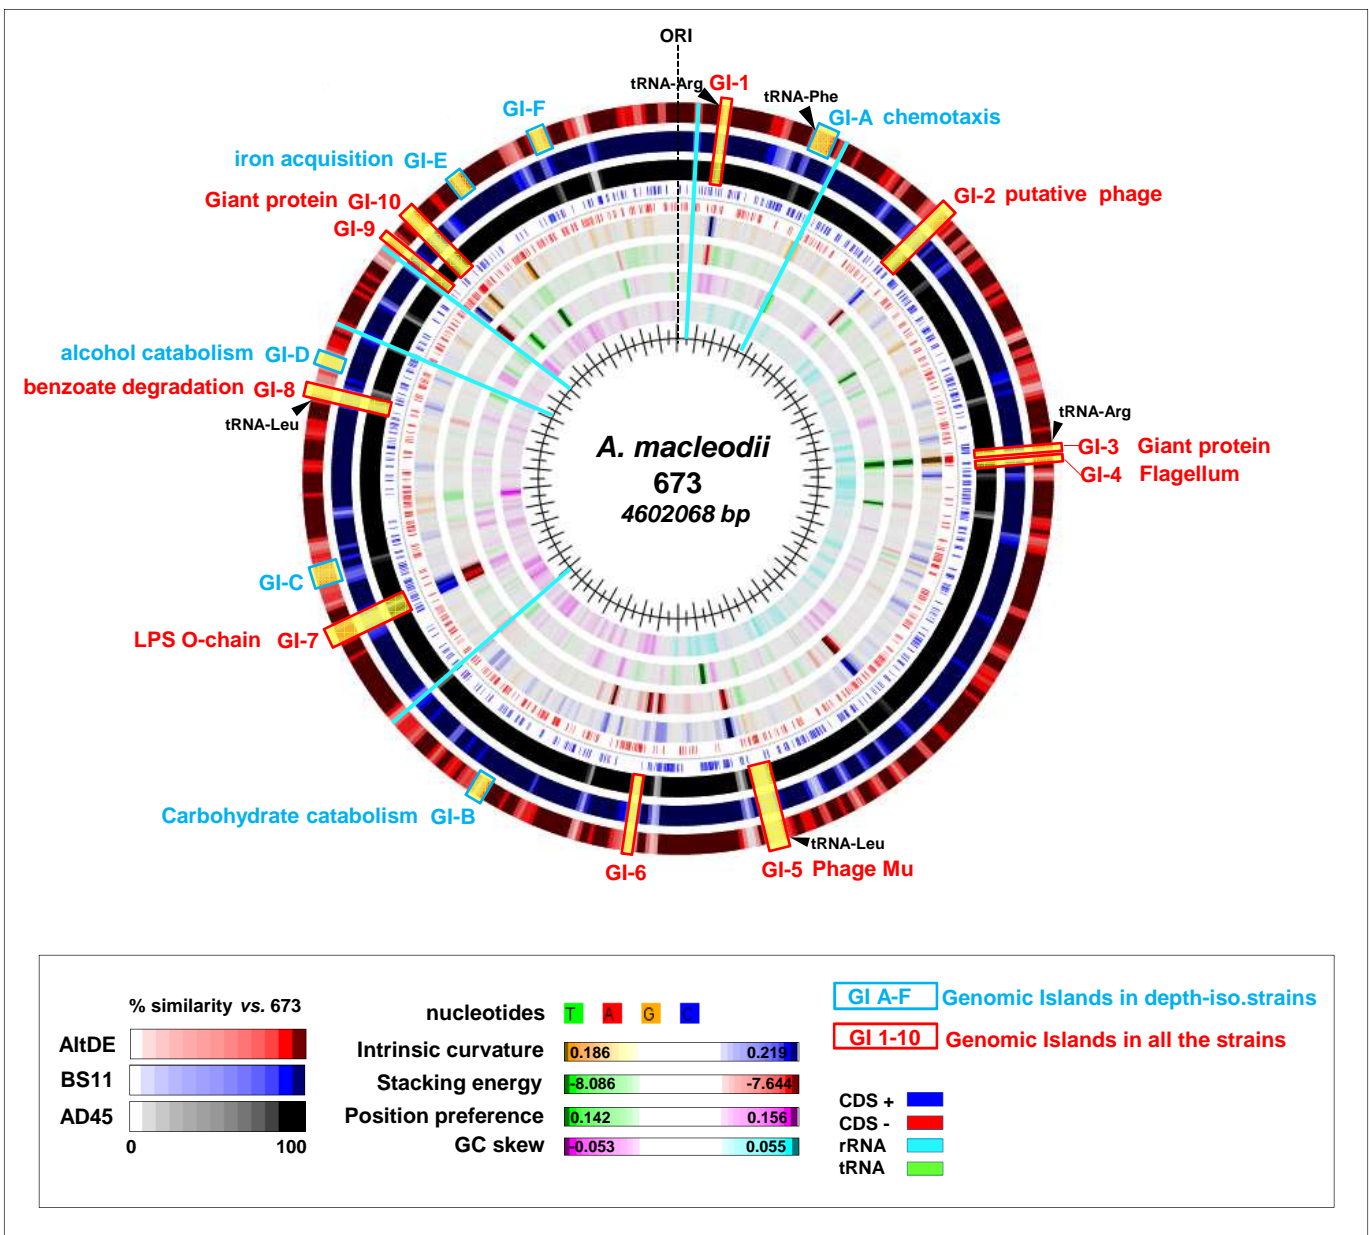

**Supplementary Figure 2:** Circular representations of the *A. macleodii* 673 genome using genome atlas (<http://www.cbs.dtu.dk/index.shtml>). Rings from outside to inside: Circles 1,2 and 3: Circular representation of the *A. macleodii* strains chromosome, AltDE, BS11 and AD45 (outside to inside). Circle 4: CDs from the 673 genome in the positive strand. Circle 5: CDS from the 673 genome in the negative strand. Circle 6: Intrinsic curvature. Circle 7: Stacking energy. Circle 8: Position preference. Circle 9: GC skew. Red squares indicates genomic island of 673 compare with all the strains. Blue squares indicates genomic island present in all the surface strains but not in AltDE.

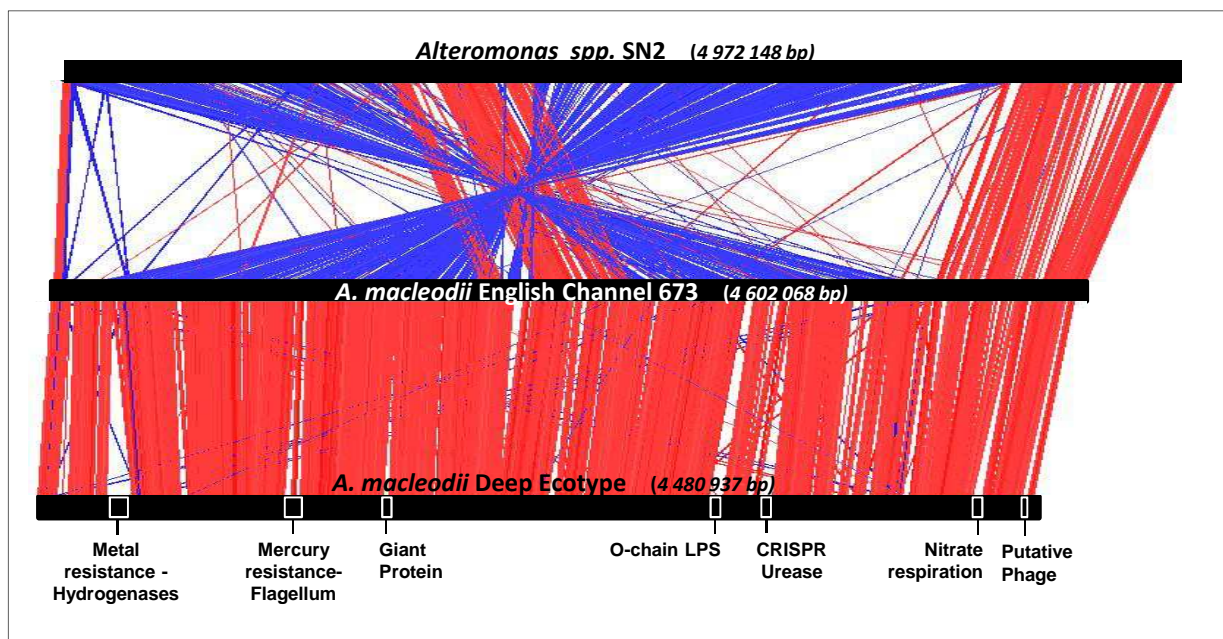

**Supplementary Figure 3:** Genome comparison of *A. macleodii* 673 versus *Alteromonas* sp. SN2 and *A. macleodii* Deep Ecotype. Chromosomes were compared using ACT. Red lines connect homologous regions present in the same orientation while the blue lines connect regions of inverted orientation. White square indicates GI as described in (Ivars et al, 2008) for AltDE.



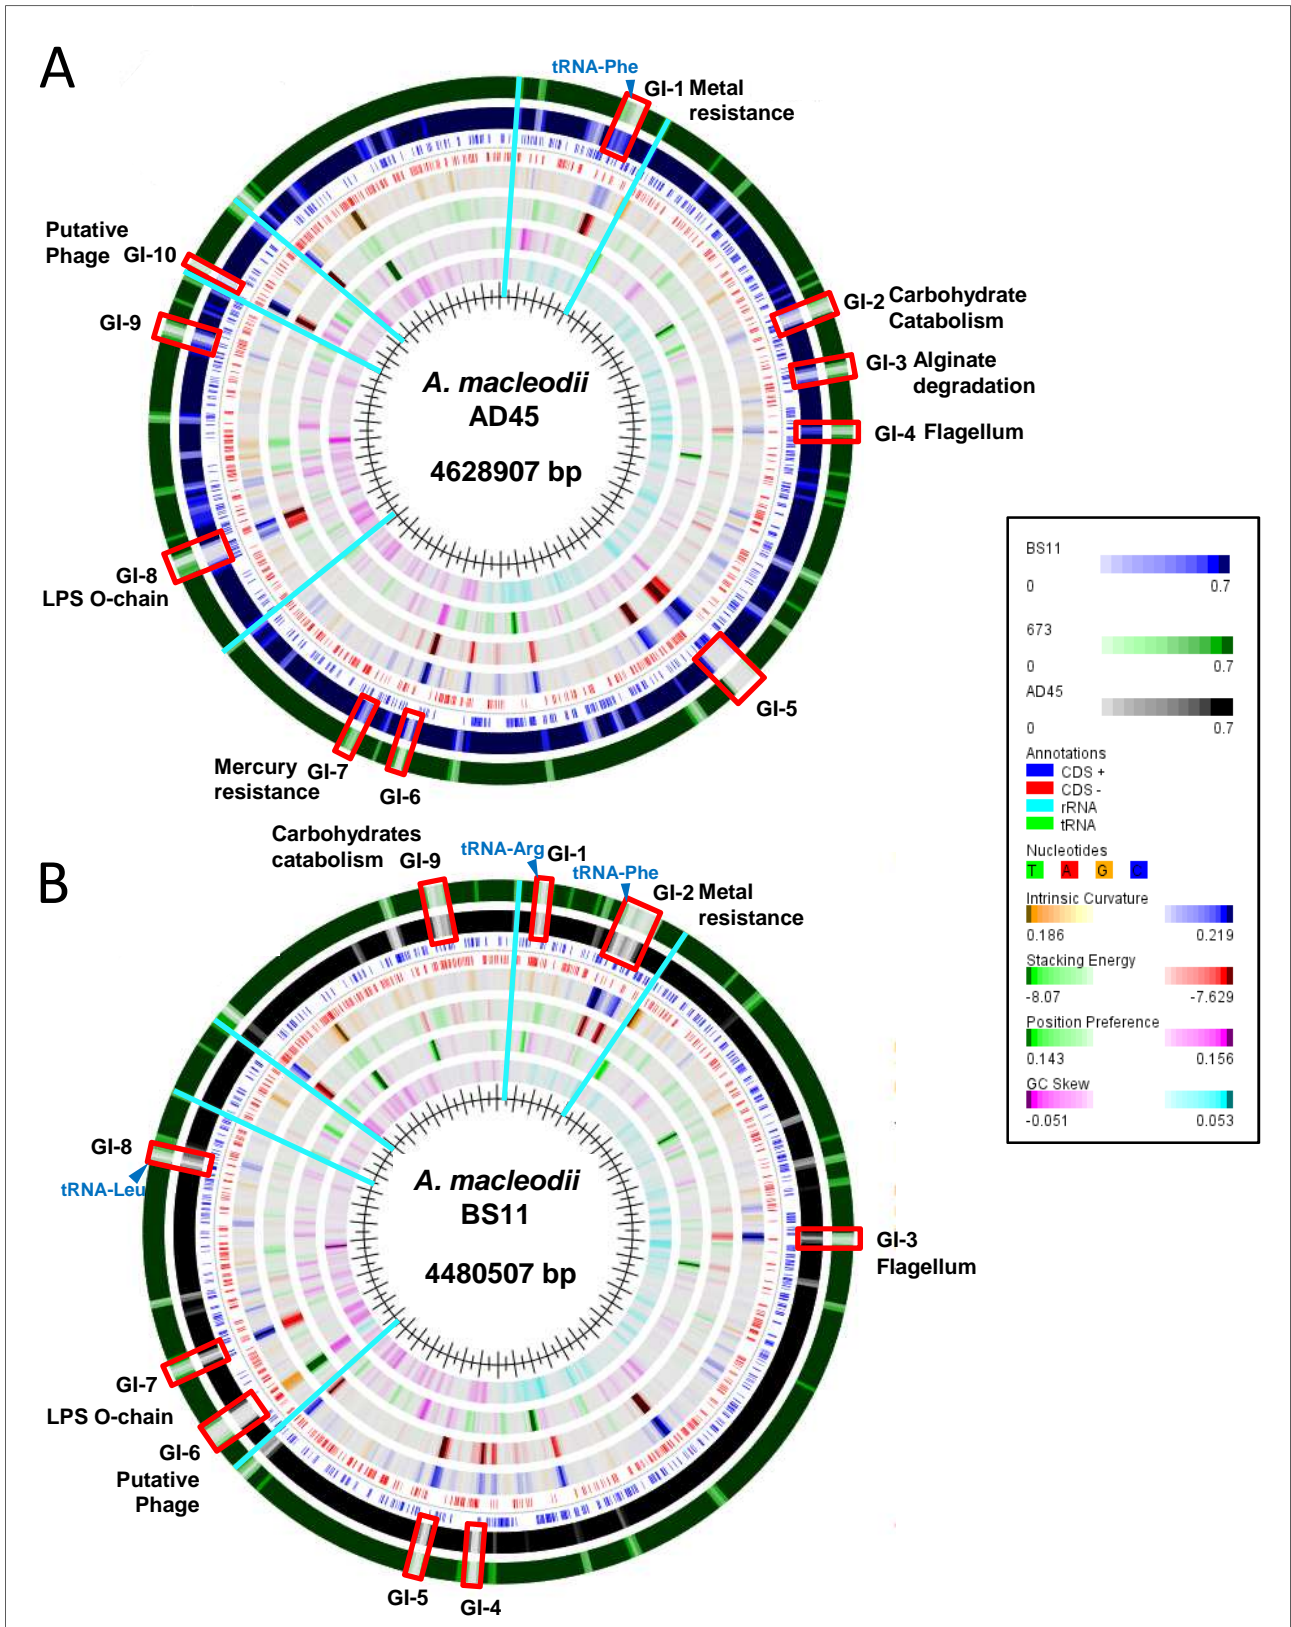

**Supplementary Figure 4.** Circular representations of *the A. macleodii* AD45 and BS11 genome using genome atlas (<http://www.cbs.dtu.dk/index.shtml>). (A) AD45 genome as a reference. Rings from the outside to inside: Circles 1 and 2: Circular representation of the *A. macleodii* strains chromosome 673 and BS11 respectively. (B) BS11 genome as a reference. Rings from the outside to inside: Circles 1 and 2: Circular representation of the *A. macleodii* strains chromosome 673 and AD45 respectively. Rests of the circles are common. Circle 3: CDS in the positive strand in blue. Circle 4: CDS in the negative strand in red. Circle 5: Intrinsic curvature. Circle 6: Stacking energy. Circle 7: Position preference. Circle 8: GC skew. Red squares indicates genomic island.

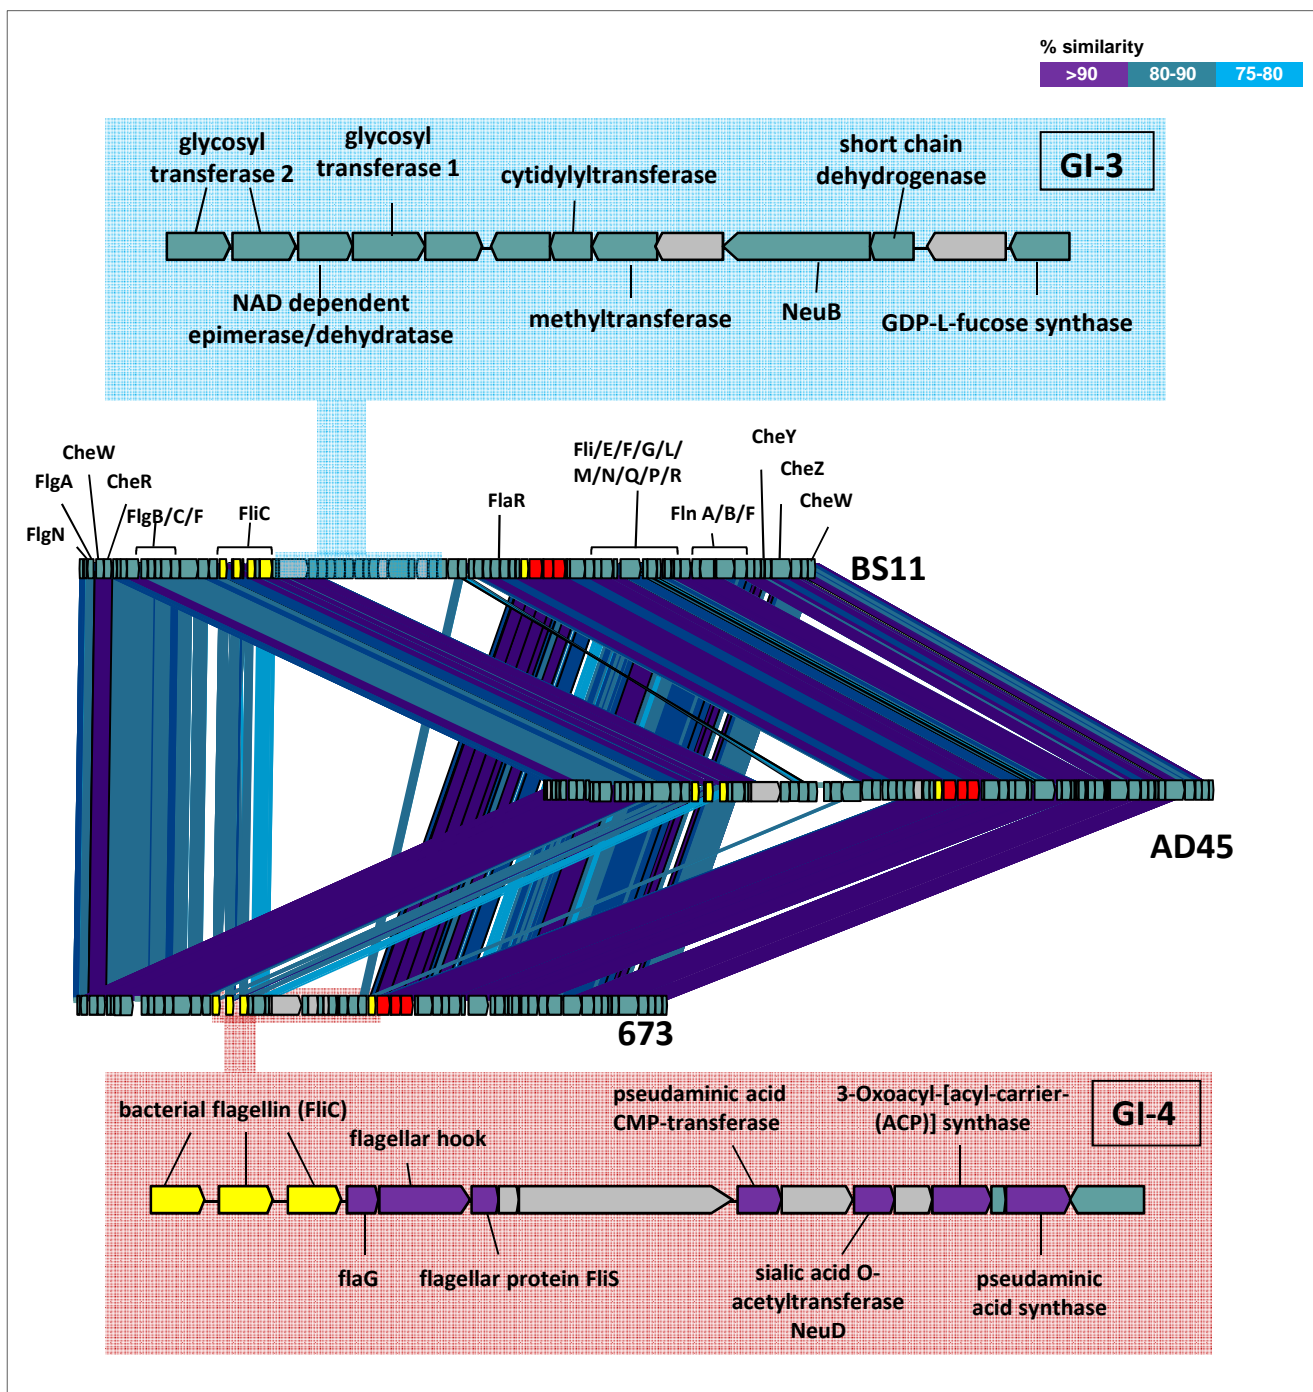

**Supplementary Figure 5:** Schematic representation comparing the flagellum gene clusters of *A. macloidii* AltDE, 673, AD45 and BS11 strains. The hypervariable region GI4 in 673 and GI3 of BS11 have been enlarged to indicate individual genes.

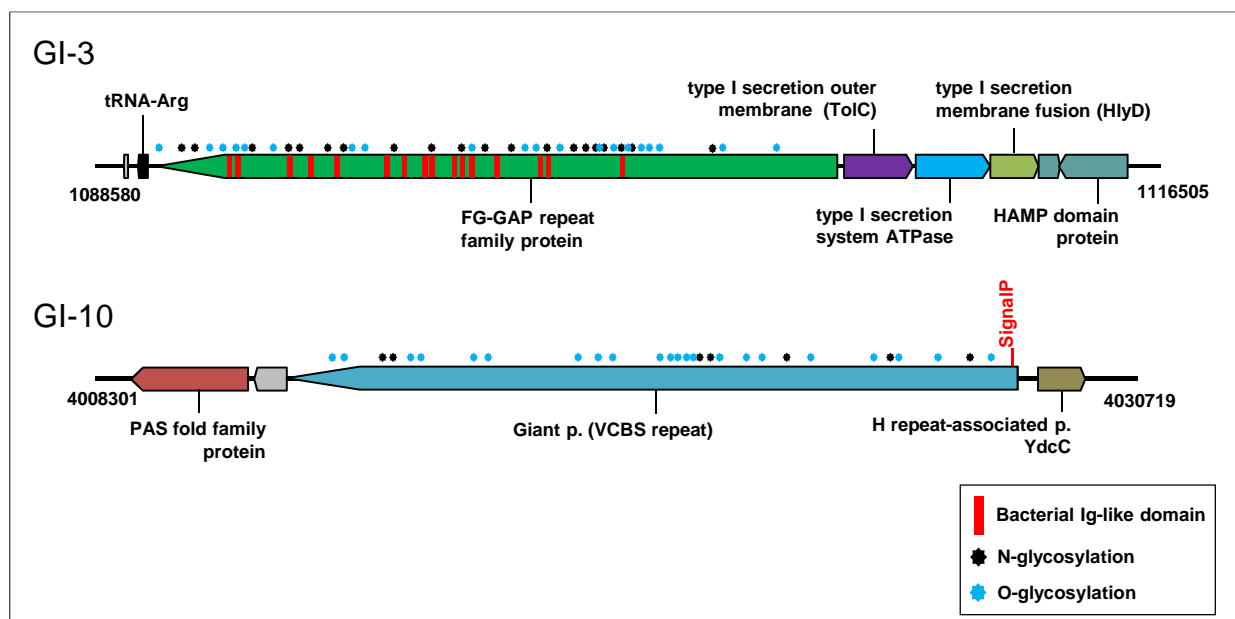

**Supplementary Figure 6.** Schematic representations for the giant proteins found in *A. macleodii* 673 GI3 and GI10.

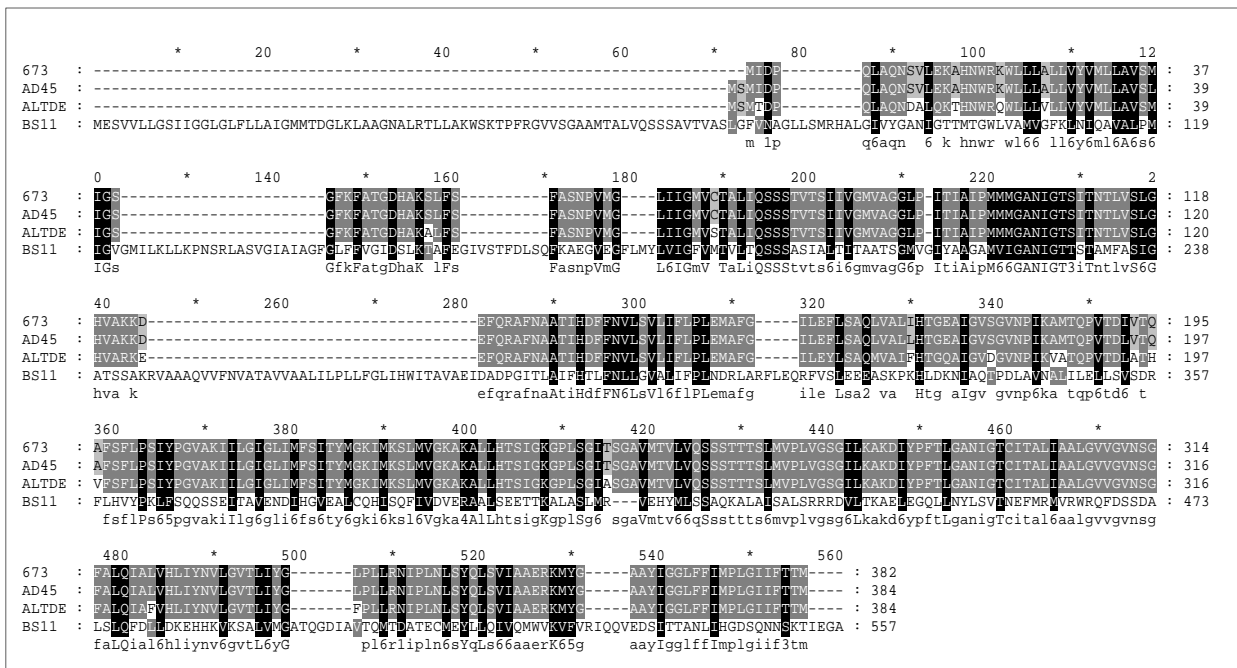

**Supplementary Figure 7.** Amino acid sequence alignment of the Na<sup>+</sup>/Pi cotransporter family protein in the genomes indicated. Multiple sequences were aligned using CLUSTALW.

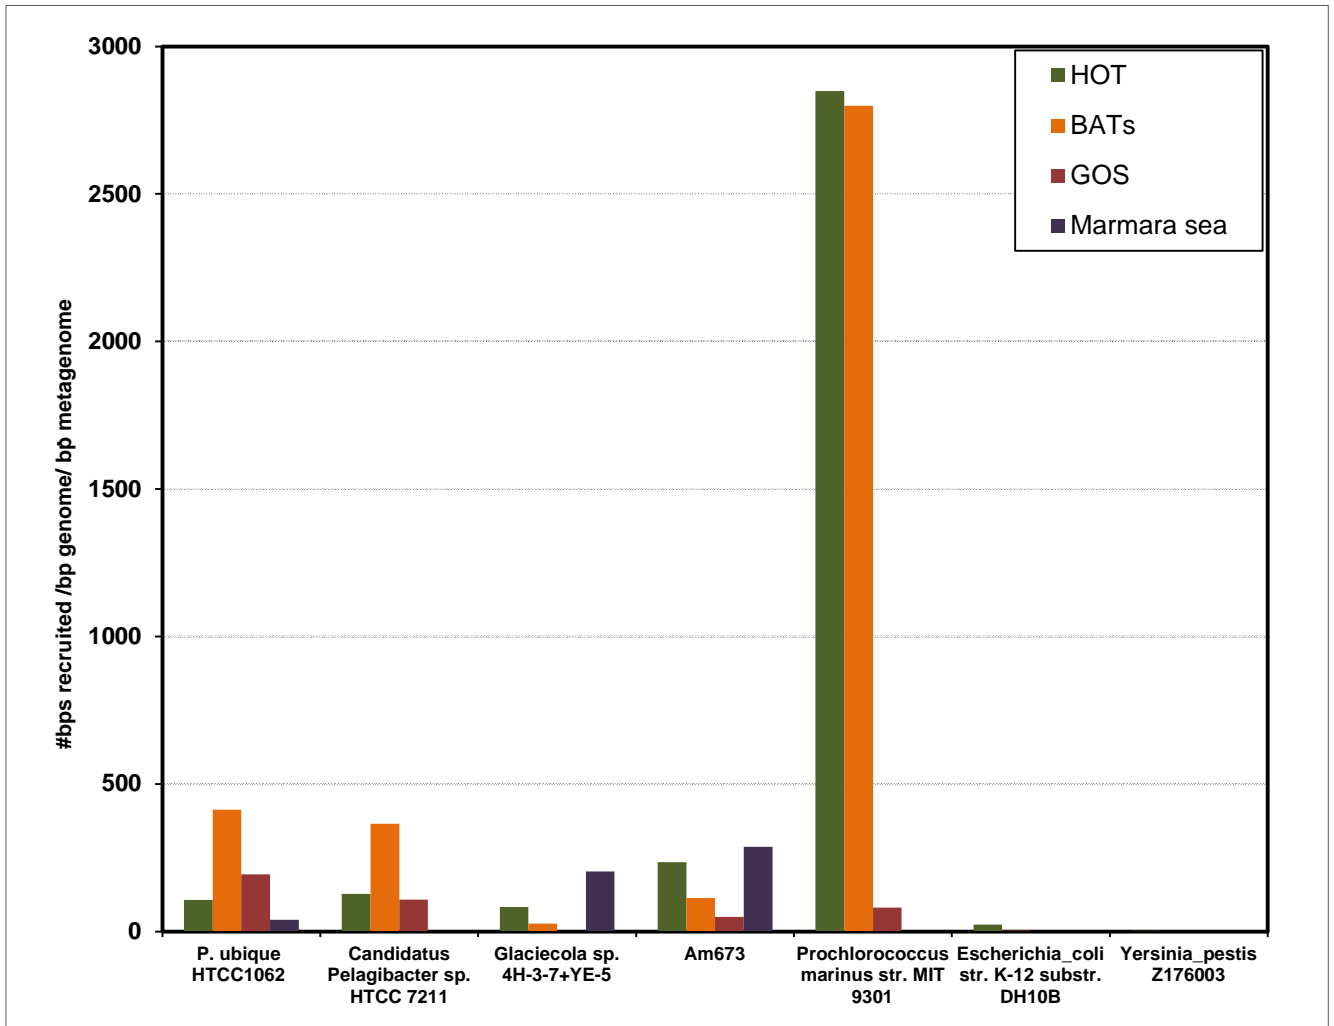

**Supplementary Figure 8.** Reads recruitment of some representative genomes of marine bacteria in HOT, BATs, GOS and Marmara Sea metagenomes. Genomes used were *Candidatus Pelagibacter ubiquus* strains HTCC 1062 and HTCC 7211, *Prochlorococcus marinus* MIT9301, *Glaciecola sp.* 4H-7+YE-5 and *A. macleodii* 673. *Yersinia pestis* Z176003 and *Escherichia coli* K12-DH10B genomes were used as negative controls.
